# Supplementary material for: Histological variant as the significant predictor of survival in patients with lymph node positive urothelial carcinoma of the bladder
Source: PubMed Central journal article supplement (PMC4427059; doi:10.1038/srep09626), 2015-05-11
Supplement: srep09626-s1.pdf [file srep09626-s1.pdf]

**TITLE**

Histological variant as the significant predictor of survival in patients with lymph node positive urothelial carcinoma of the bladder

**SHORT TITLE**

The prognostic value of histological variant in node positive urothelial bladder cancer

**AUTHORS AND INSTITUTIONS**

Hyung Suk Kim<sup>1</sup>, Kyung Chul Moon<sup>2</sup>, Chang Wook Jeong<sup>1</sup>, Cheol Kwak<sup>1</sup>, Hyeon Hoe Kim<sup>1</sup>, Ja Hyeon Ku<sup>1</sup>\*

<sup>1</sup>Department of Urology, Seoul National University College of Medicine, Seoul, Korea

<sup>2</sup>Department of Pathology, Seoul National University College of Medicine, Seoul, Korea

**★ CORRESPONDENCE**

Ja Hyeon Ku, M.D. PhD.

Department of Urology, Seoul National University Hospital,

101 Daehak-ro, Jongno-gu, Seoul 110-744, Korea

Tel: 82-2-2072-0361

Fax: 82-2-742-4665

E-mail: [kuuro70@snu.ac.kr](mailto:kuuro70@snu.ac.kr)

**Supplemental Table 1.** Distributions of histological variants of UC

| Histological variants of UC              | Overall<br>(n=57) | LN(-)<br>(n=42) | LN(+)<br>(n=15) |
|------------------------------------------|-------------------|-----------------|-----------------|
| Types                                    |                   |                 |                 |
| Squamous differentiation, n (%)          | 34 (60%)          | 27 (64%)        | 7 (47%)         |
| Glandular differentiation, n (%)         | 6 (10%)           | 4 (9.6%)        | 2 (13%)         |
| Nested variant, n (%)                    | 2 (3.5%)          | 0 (0%)          | 2 (13%)         |
| Clear cell, n (%)                        | 1 (1.8%)          | 1 (2.4%)        | 0 (0%)          |
| Plasmacytoid, n (%)                      | 4 (7%)            | 2 (4.8%)        | 2 (13%)         |
| Intracytoplasmic mucin production, n (%) | 1 (1.8%)          | 0 (0%)          | 1 (7%)          |
| Signet ring cell, n (%)                  | 1 (1.8%)          | 1 (2.4%)        | 0 (0%)          |
| Micropapillary, n (%)                    | 3 (5.3%)          | 2 (4.8%)        | 1 (7%)          |
| Sarcomatoid, n (%)                       | 5 (8.8%)          | 5 (12%)         | 0 (0%)          |
| Pathologic T stage, n (%)                |                   |                 |                 |
| Non-muscle invasive (pT0/Ta/T1/CIS)      | 11 (19.3%)        | 11 (26.2%)      | 0 (0%)          |
| Muscle invasive (pT2)                    | 13 (22.8%)        | 12 (28.6%)      | 1 (6.7%)        |
| Extravesical (pT3/T4)                    | 33 (57.9%)        | 19 (45.2%)      | 14 (93.3%)      |

UC=urothelial carcinoma; LN=lymph node

**Supplemental Table 2.** Uni-variate and multivariate logistic regression analyses results for the risk factors associated with lymph node involvement after radical cystectomy and pelvic lymph node dissection

|                                     | Univariate analysis |            |         | Multivariate analysis |            |         |
|-------------------------------------|---------------------|------------|---------|-----------------------|------------|---------|
|                                     | Unadjusted OR       | 95% CI     | p-value | Adjusted OR           | 95% CI     | p-value |
| Pathologic T stage                  |                     |            |         |                       |            |         |
| Non-muscle invasive (pT0/Ta/T1/CIS) | Reference           |            |         | Reference             |            |         |
| Muscle invasive (pT2)               | 5.54                | 2.48-12.38 | <0.001  | 3.82                  | 1.65-8.88  | 0.002   |
| Extravesical (pT3/T4)               | 11.53               | 5.64-23.58 | <0.001  | 5.84                  | 2.62-13.00 | <0.001  |
| LVI                                 |                     |            |         |                       |            |         |
| Absent                              | Reference           |            |         | Reference             |            |         |
| Present                             | 6.20                | 3.75-10.24 | <0.001  | 2.66                  | 1.49-4.75  | 0.001   |
| Pathologic grade                    |                     |            |         |                       |            |         |
| Low grade                           | Reference           |            |         | Reference             |            |         |
| High grade                          | 4.25                | 1.65-10.89 | 0.003   | 0.99                  | 0.33-2.96  | 0.990   |
| Perivesical margin                  |                     |            |         |                       |            |         |
| Absent                              | Reference           |            |         | Reference             |            |         |
| Present                             | 15.7                | 3.27-75.37 | 0.001   | 5.11                  | 1.04-25.14 | 0.045   |

OR=odds ratio; CI=confidence interval; LVI=lymphovascular invasion

**Supplemental Table 3.** Uni-variate and multivariate Cox regression analyses results for evaluating variables associated with overall survival in lymph node negative group

|                                     | Univariate analysis |           |         | Multivariate analysis |            |         |
|-------------------------------------|---------------------|-----------|---------|-----------------------|------------|---------|
|                                     | Unadjusted HR       | 95% CI    | p-value | Adjusted HR           | 95% CI     | p-value |
| Age, year,                          |                     |           |         |                       |            |         |
| < 60yrs                             | Reference           |           |         | Reference             |            |         |
| ≥ 60yrs                             | 2.17                | 1.30-3.64 | 0.003   | 2.25                  | 1.33-3.82  | 0.003   |
| BMI(kg/m2),                         |                     |           |         |                       |            |         |
| <25                                 | Reference           |           |         | Reference             |            |         |
| ≥25                                 | 0.43                | 0.24-0.75 | 0.003   | 0.47                  | 0.27-0.81  | 0.007   |
| Pathologic T stage                  |                     |           |         |                       |            |         |
| Non-muscle invasive (pT0/Ta/T1/CIS) | Reference           |           |         | Reference             |            |         |
| Muscle invasive (pT2)               | 0.69                | 0.35-1.37 | 0.291   | 0.53                  | 0.25-1.10  | 0.089   |
| Extravesical (pT3/T4)               | 2.92                | 1.87-4.55 | <0.001  | 2.39                  | 1.40-4.07  | 0.001   |
| Variant histology of UC             |                     |           |         |                       |            |         |
| Absent                              | Reference           |           |         |                       |            |         |
| Present                             | 1.02                | 0.57-1.80 | 0.960   |                       |            |         |
| LVI                                 |                     |           |         |                       |            |         |
| Absent                              | Reference           |           |         | Reference             |            |         |
| Present                             | 1.99                | 1.30-3.03 | 0.001   | 1.58                  | 0.95-2.65  | 0.078   |
| Perivesical margin                  |                     |           |         |                       |            |         |
| Absent                              | Reference           |           |         | Reference             |            |         |
| Present                             | 11.26               | 2.73-46.4 | 0.001   | 3.41                  | 0.79-14.68 | 0.099   |
| Number of LNs removed (continuous)  | 0.94                | 0.91-0.97 | <0.001  | 0.94                  | 0.91-0.97  | <0.001  |

HR=hazard ratio; CI=confidence interval; BMI=body mass index; LVI=lymphovascular invasion; LNs=lymph nodes

**Supplemental Table 4.** Uni-variate and multivariate Cox regression analyses results for evaluating variables associated with cancer specific survival in lymph node negative group

|                                     | Univariate analysis |            |         | Multivariate analysis |            |         |
|-------------------------------------|---------------------|------------|---------|-----------------------|------------|---------|
|                                     | Unadjusted HR       | 95% CI     | p-value | Adjusted HR           | 95% CI     | p-value |
| BMI(kg/m2),                         |                     |            |         |                       |            |         |
| <25                                 | Reference           |            |         | Reference             |            |         |
| ≥25                                 | 0.49                | 0.25-0.94  | 0.034   | 0.51                  | 0.26-0.98  | 0.045   |
| Pathologic T stage                  |                     |            |         |                       |            |         |
| Non-muscle invasive (pT0/Ta/T1/CIS) | Reference           |            |         | Reference             |            |         |
| Muscle invasive (pT2)               | 0.79                | 0.35-1.79  | 0.576   | 0.53                  | 0.22-1.29  | 0.165   |
| Extravesical (pT3/T4)               | 2.93                | 1.68-5.10  | <0.001  | 1.91                  | 0.98-3.71  | 0.057   |
| Variant histology of UC             |                     |            |         |                       |            |         |
| Absent                              | Reference           |            |         |                       |            |         |
| Present                             | 0.64                | 0.27-1.48  | 0.294   |                       |            |         |
| LVI                                 |                     |            |         |                       |            |         |
| Absent                              | Reference           |            |         | Reference             |            |         |
| Present                             | 2.41                | 1.44-4.05  | 0.001   | 1.94                  | 1.03-3.65  | 0.039   |
| Perivesical margin                  |                     |            |         |                       |            |         |
| Absent                              | Reference           |            |         | Reference             |            |         |
| Present                             | 9.37                | 1.27-68.75 | 0.028   | 3.69                  | 0.48-28.26 | 0.209   |
| Extent of PLND                      |                     |            |         |                       |            |         |
| Limited                             | Reference           |            |         | References            |            |         |
| Standard                            | 0.65                | 0.23-0.98  | 0.045   | 0.59                  | 0.33-1.08  | 0.089   |
| Extended                            | 0.10                | 0.01-0.80  | 0.030   | 0.29                  | 0.04-2.33  | 0.243   |
| Number of LNs removed (continuous)  | 0.92                | 0.89-0.96  | <0.001  | 0.91                  | 0.88-0.95  | <0.001  |
| Adjuvant CTx.                       |                     |            |         |                       |            |         |
| Not done                            | Reference           |            |         | Reference             |            |         |
| Done                                | 1.79                | 1.00-3.18  | 0.047   | 0.83                  | 0.38-1.81  | 0.643   |

HR=hazard ratio; CI=confidence interval; BMI=body mass index; LVI=lymphovascular invasion; PLND=pelvic lymph node dissection; LNs=lymph nodes; CTx=chemotherapy
